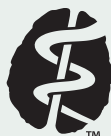

# The American Journal of Psychiatry

Official Journal of the American Psychiatric Association

## Officers 2015–2016

### President

Renée L. Binder, M.D.

### President-Elect

Maria A. Oquendo, M.D.

### Treasurer

Frank W. Brown, M.D.

### Secretary

Altha J. Stewart, M.D.

### Assembly

#### Speaker

Glenn A. Martin, M.D.

#### Speaker-Elect

Daniel J. Anzia, M.D.

#### Recorder

Theresa Miskimen, M.D.

### Office of the CEO and Medical Director

#### CEO and Medical Director

Saul Levin, M.D., M.P.A.

### Board of Trustees

Jeffrey Akaka, M.D.

Lama Bazzi, M.D.

R. Scott Benson, M.D.

Ronald M. Burd, M.D.

Stella Cai, M.D.

Brian Crowley, M.D.

Anita S. Everett, M.D.

Jeffrey L. Geller, M.D., M.P.H.

Dilip V. Jeste, M.D.

Jeffrey A. Lieberman, M.D.

Vivian B. Pender, M.D.

Gail E. Robinson, M.D.

Ravi N. Shah, M.D.

Paul Summergrad, M.D.

Melinda Young, M.D.

## Editorial Board

### Editor

Robert Freedman, M.D.

### Deputy Editors

David A. Lewis, M.D.

Robert Michels, M.D.

Daniel S. Pine, M.D.

A. John Rush, M.D.

Susan K. Schultz, M.D.

Carol A. Tamminga, M.D.

### Associate Editors

Alan Brown, M.D., M.P.H.

Tyrone Cannon, Ph.D.

Benjamin G. Druss, M.D., M.P.H.

Graham J. Emslie, M.D.

Daniel C. Javitt, M.D.

Bankole Johnson, M.D.

Ellen Leibenluft, M.D.

Joan L. Luby, M.D.

Constantine G. Lyketsos, M.D., M.H.S.

Helen S. Mayberg, M.D., F.R.C.P.C.

Barbara Milrod, M.D.

Terrie E. Moffitt, Ph.D.

Anita Thapar, M.B.B.Ch., F.R.C.Psych.,

Ph.D., F.Med.Sci.

Mauricio Tohen, M.D., Dr.PH., M.B.A.

Eduard Vieta, M.D., Ph.D.

Katherine L. Wisner, M.D., M.S.

Xin Yu, M.D.

### Editor Emerita

Nancy C. Andreasen, M.D., Ph.D.

### Former Editors

Amariah Brigham, M.D., 1844–1849

T. Romeyn Beck, M.D., 1849–1854

John P. Gray, M.D., 1854–1886

G. Alder Blumer, M.D., 1886–1894

Richard Dewey, M.D., 1894–1897

Henry M. Hurd, M.D., 1897–1904

Edward N. Brush, M.D., 1904–1931

Clarence B. Farrar, M.D., 1931–1965

Francis J. Braceland, M.D., 1965–1978

John C. Nemiah, M.D., 1978–1993

### Editorial Staff

#### Executive Editor

Michael D. Roy

#### Senior Editors

John J. Guardiano, Ph.D.

Jane Weaver

#### Production Manager

Susan Westrate

#### Assistant Editor

Angela Moore

#### Online Content Manager

Michael Pogachar

#### Editorial Assistant

Linda LaCour

#### Editorial Assistant/Permissions

##### Coordinator

Jane Cha

#### Assistants to the Editors

Lois Lilienthal

Laura English

Rachel Hogg

Russell A. Scholl

### Publisher

Rebecca D. Rinehart
