# The American Journal of Psychiatry

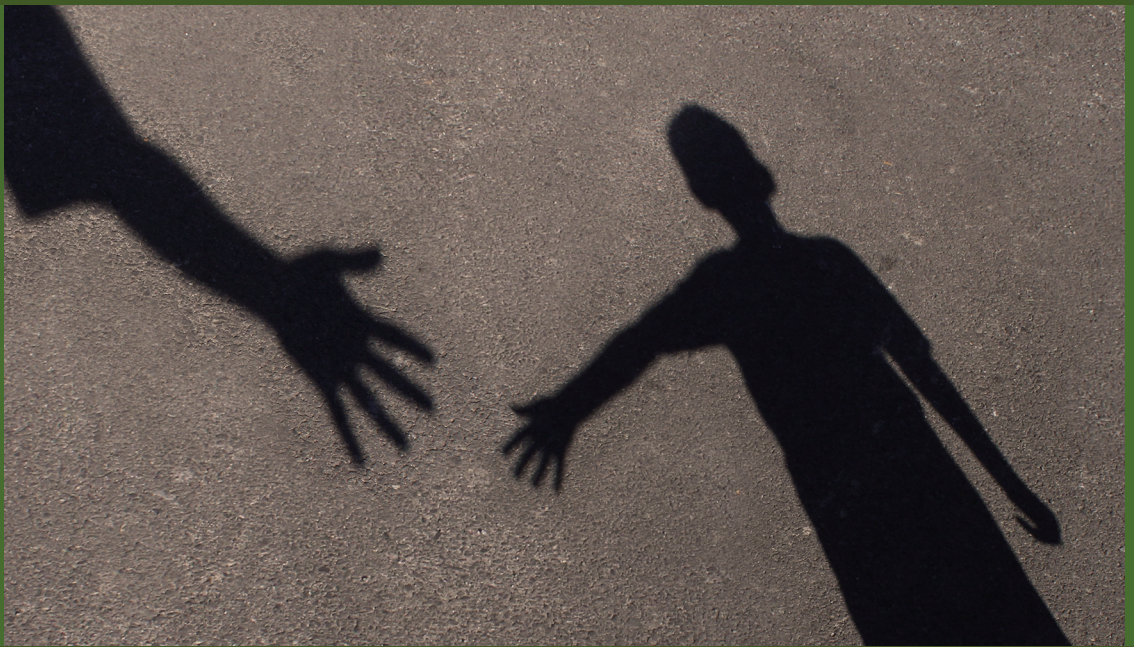

Pediatric-Onset and Adult-Onset Separation Anxiety Disorder  
Across Countries in the World Mental Health Survey

The Alternative DSM-5 Model for Personality Disorders:  
A Clinical Application

The Intergenerational Transmission of Anxiety:  
A Children-of-Twins Study

Diagnostic Precursors to Bipolar Disorder in Offspring of Parents  
With Bipolar Disorder: A Longitudinal Study
